# Supplementary material for: Roles of solvent, annealing and Bi3+ co-doping on the crystal structure and luminescence properties of YPO4:Eu3+ nanoparticles
Source: Royal Society of Chemistry journal article supplement (doi:10.1039/c5ra11587f), 2015-01-01
Supplement: c5ra11587f1.pdf [file c5ra11587f1.pdf]

## Electronic Supplementary Information (ESI†)

### **Roles of solvent, annealing and Bi<sup>3+</sup> co-doping on crystal structure and luminescence properties of YPO<sub>4</sub>: Eu<sup>3+</sup> Nanoparticles**

R. S. Ningthoujam,\* Anusha Sharma, K. S. Sharma, K. C. Barick, P. A. Hassan, R. K. Vatsa\*  
*Chemistry Division, Bhabha Atomic Research Centre, Mumbai – 400085, India*

Corresponding authors: Phone: + 91 22 25592321, Fax: + 91 22 25505151,  
E-mail: [rsn@barc.gov.in](mailto:rsn@barc.gov.in) (RSN), [rkvatsa@barc.gov.in](mailto:rkvatsa@barc.gov.in) (RKV)

### **Materials**

All reagents used were of analytical grade (AR) grade. The starting materials for Y<sup>3+</sup>, PO<sub>4</sub><sup>3-</sup>, Eu<sup>3+</sup>, Bi<sup>3+</sup> are yttrium oxide (Y<sub>2</sub>O<sub>3</sub>, 99.99%, Sigma Aldrich), ammonium dihydrogen phosphate (NH<sub>4</sub>H<sub>2</sub>PO<sub>4</sub>, 99.999%, Sigma Aldrich) and europium nitrate hexahydrate (Eu(NO<sub>3</sub>)<sub>3</sub>.6H<sub>2</sub>O, 99.9%, Sigma Aldrich), bismuth nitrate pentahydrate (Bi(NO<sub>3</sub>)<sub>3</sub>.5H<sub>2</sub>O, 99.99%, Sigma Aldrich), respectively. Concentrated nitric acid (HNO<sub>3</sub>), ethylene glycol (EG), polyethylene glycol (PEG-6000), polyethylene glycol diacid (PEG-Diacid-600) were used without further purification. Milli Q water was used in the experiment.

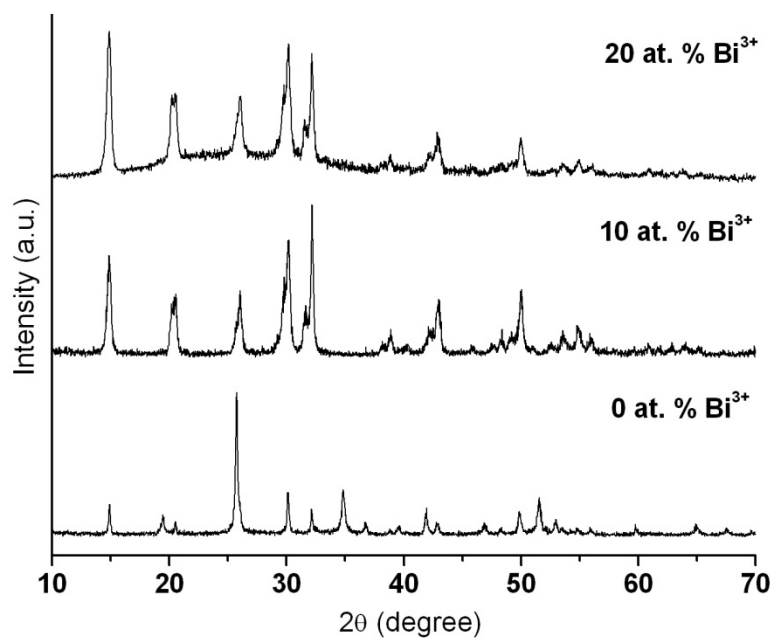

Fig. S1. XRD patterns of YPO<sub>4</sub>:Eu co-doped with different concentrations of Bi<sup>3+</sup> (0, 10 and 20 at. %) samples prepared in PEG-diacid medium.

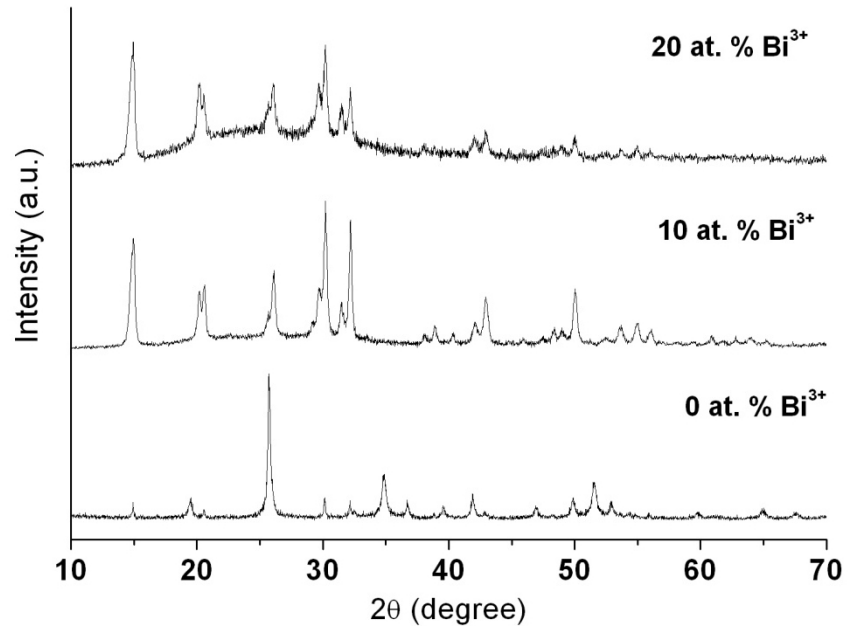

Fig. S2. XRD patterns of YPO<sub>4</sub>:Eu co-doped with different concentrations of Bi<sup>3+</sup> (0, 10 and 20 at. %) prepared in water medium.

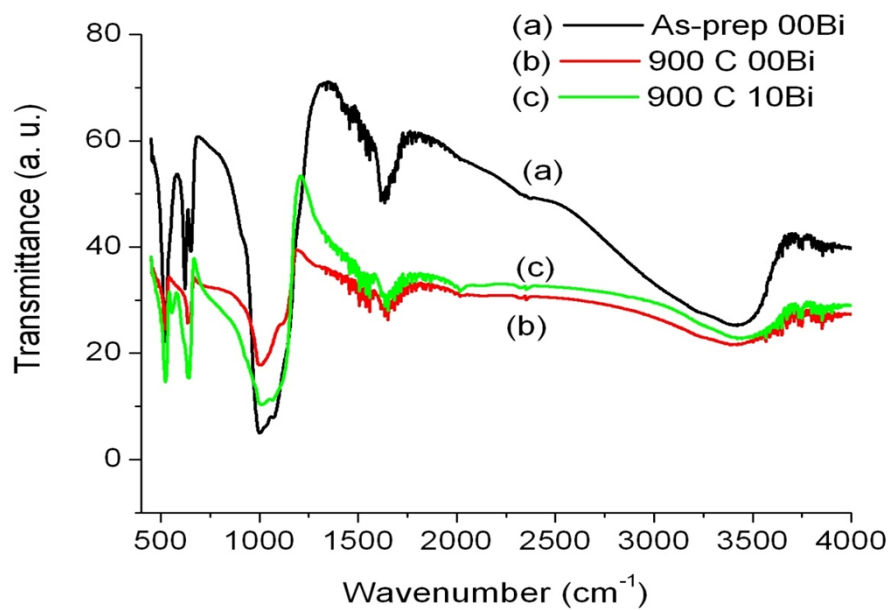

Fig. S3. FTIR spectra of YPO<sub>4</sub>:Eu co-doped with different concentrations of Bi<sup>3+</sup> samples prepared in PEG-diacid: (a) as-prepared (0 at.% Bi) and 900 °C heated samples (0 at.% Bi<sup>3+</sup> (b) and 10 at.% Bi<sup>3+</sup> (c)).

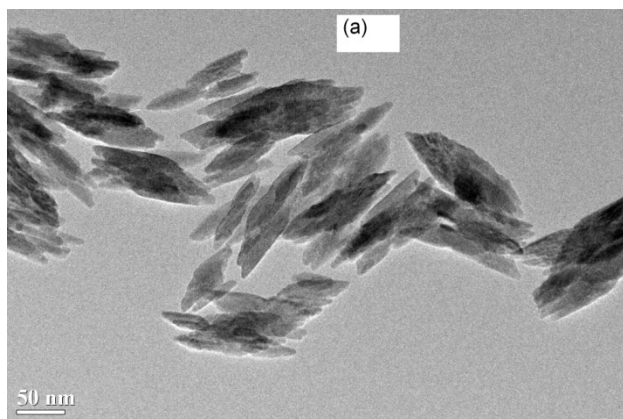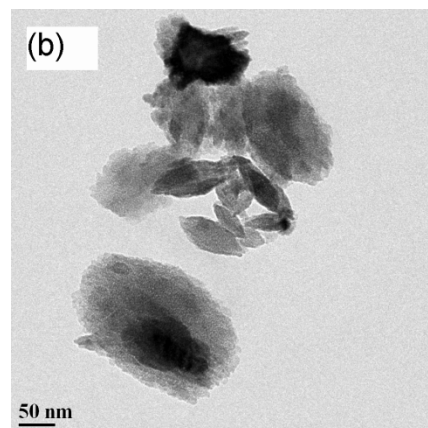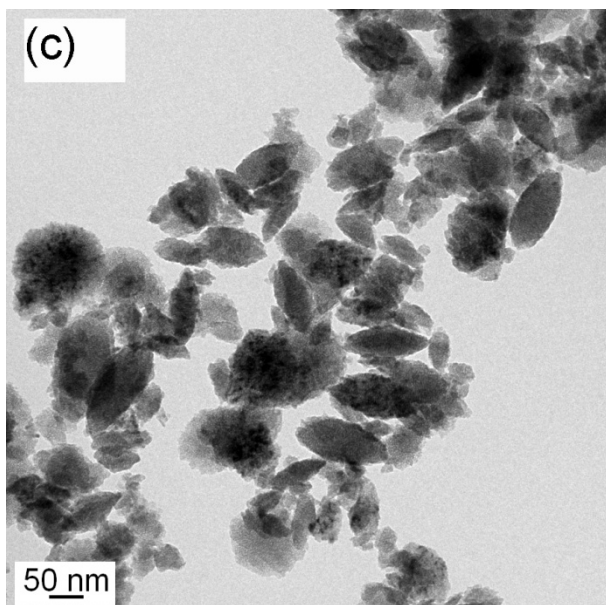

Fig. S4. TEM images of as-prepared  $\text{YPO}_4:\text{Eu}$  in different solvents: (a) PEG, (b) PEG-diacid and (c) water. It looks that there are more uniform sizes of particles in (a) as compared to (b) or (c). These will be characteristic of particles in different solvents.

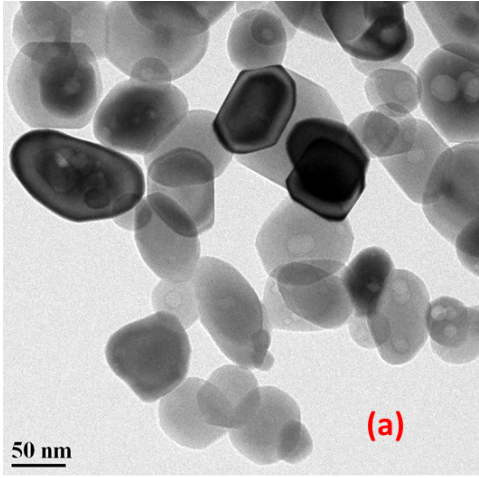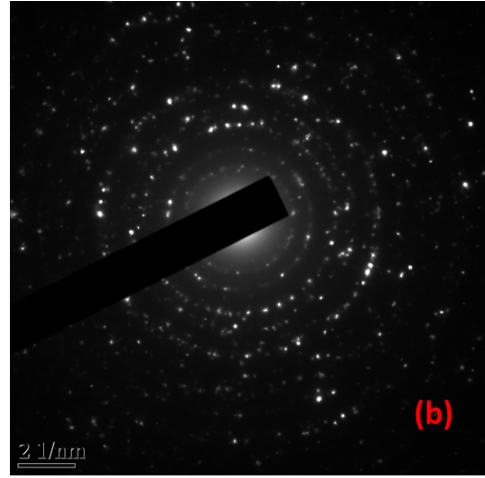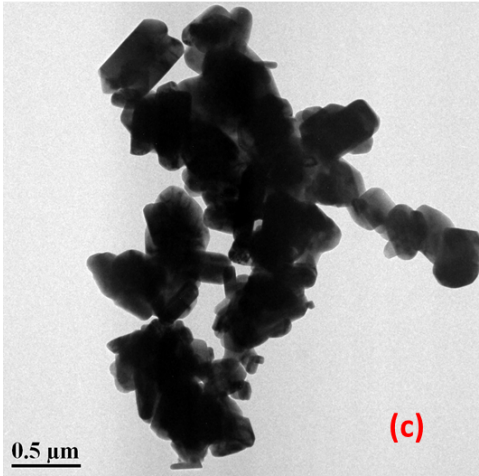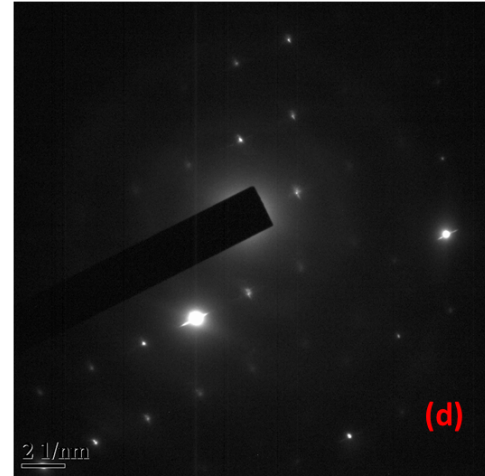

Fig. S5. TEM images of 900 °C heated samples of  $\text{YPO}_4:\text{Eu}$  prepared in PEG-diacid: (a) 0 at.% Bi and (c) 10 at.% Bi and their corresponding SAED patterns (b) and (d).

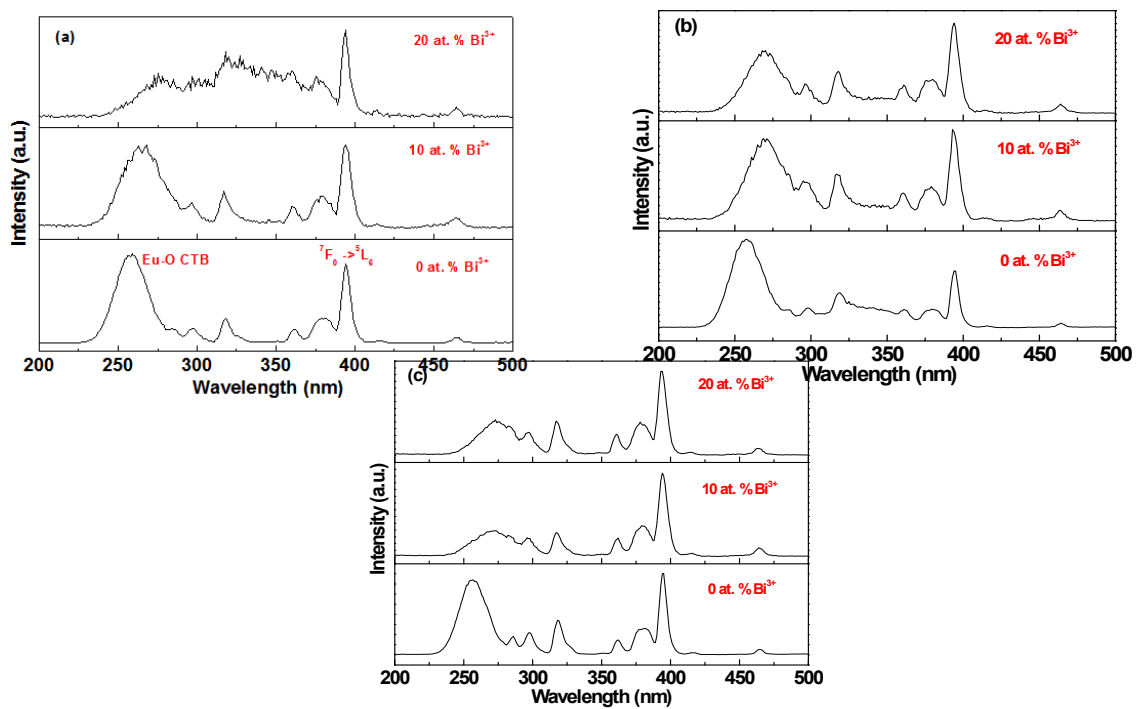

Fig. S6. Excitation spectra (monitoring emission wavelength at 612 nm) of Bi<sup>3+</sup> (0, 10 and 20 at.%) co-doped YPO<sub>4</sub>:Eu prepared in different solvents (a) PEG, (b) PEG-diacid and (c) water.

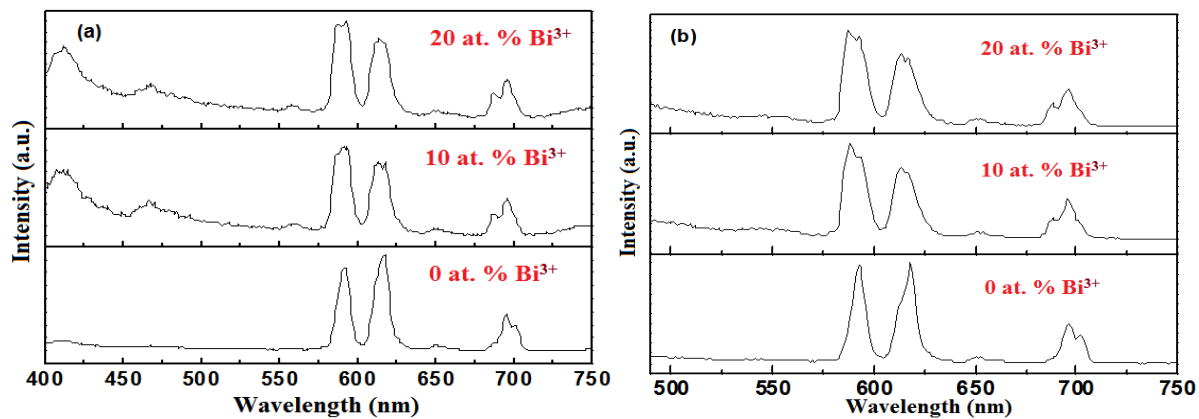

Fig. S7. Emission spectra of Bi<sup>3+</sup> co-doped YPO<sub>4</sub>:Eu prepared in PEG-diacid solvent after excitation at (a) 260 and (b) 395 nm.



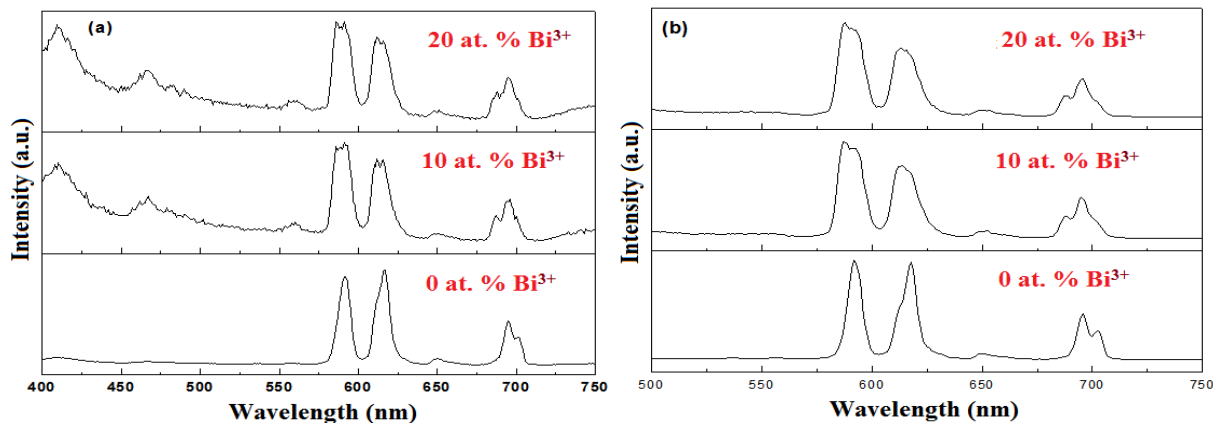

Fig. S8. Emission spectra of  $\text{Bi}^{3+}$  co-doped  $\text{YPO}_4:\text{Eu}$  prepared in water after excitation at (a) 260 and (b) 395 nm.

Note: There are a typical emission peak of  $\text{Eu}^{3+}$  at  $\sim 592$  nm corresponding to the magnetic dipole transition ( ${}^5\text{D}_0 \rightarrow {}^7\text{F}_1$ ) along with peak at  $\sim 617$  nm corresponding to the electric dipole transitions ( ${}^5\text{D}_0 \rightarrow {}^7\text{F}_2$ ). Here,  ${}^5\text{D}_0 \rightarrow {}^7\text{F}_1$  transition has  $\Delta j = \pm 1$  and it should have 2 splitting. Whereas,  ${}^5\text{D}_0 \rightarrow {}^7\text{F}_2$  transition has  $\Delta j = \pm 2$  and it should have 3 splitting.

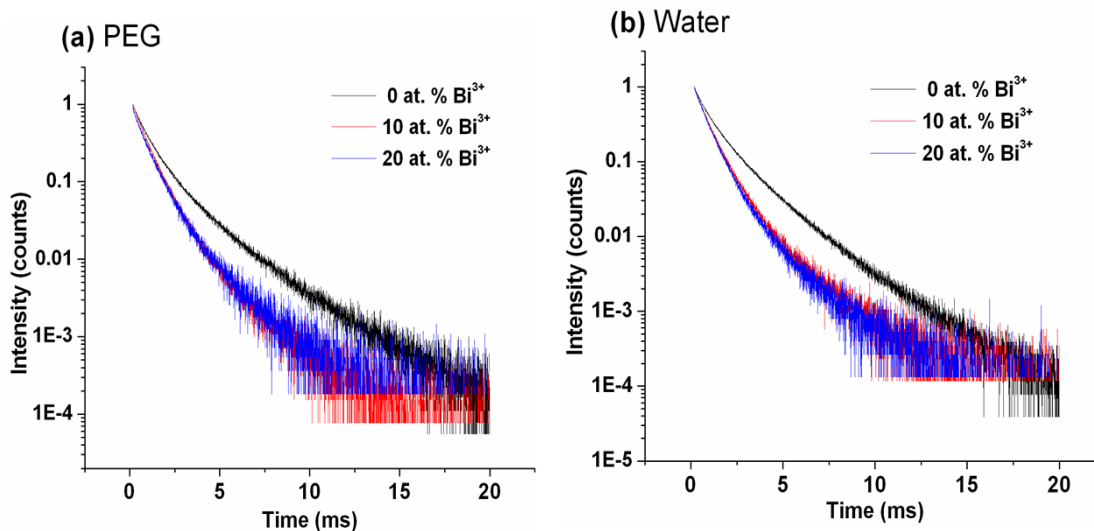

(c) 10 at.%Bi 900 °C annealed sample

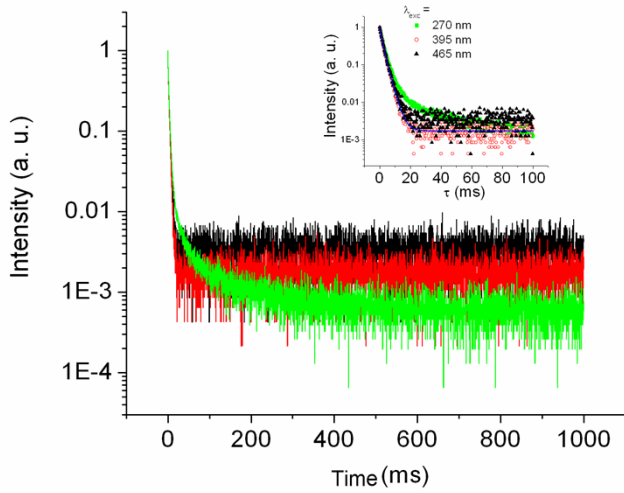

Fig. S9. Decay curves of  $^5D_0$  (612 nm) level of  $\text{Eu}^{3+}$  in Bi-doped  $\text{YPO}_4:\text{Eu}^{3+}$  as prepared samples prepared in (a) PEG ( $\lambda_{\text{exc}} = 395$  nm) and (b) water ( $\lambda_{\text{exc}} = 395$  nm). (c) 900 °C heated  $\text{YPO}_4:\text{Eu}-10\text{Bi}$  samples prepared in PEG-diacid ( $\lambda_{\text{exc}} = 270, 395, 465$  nm).

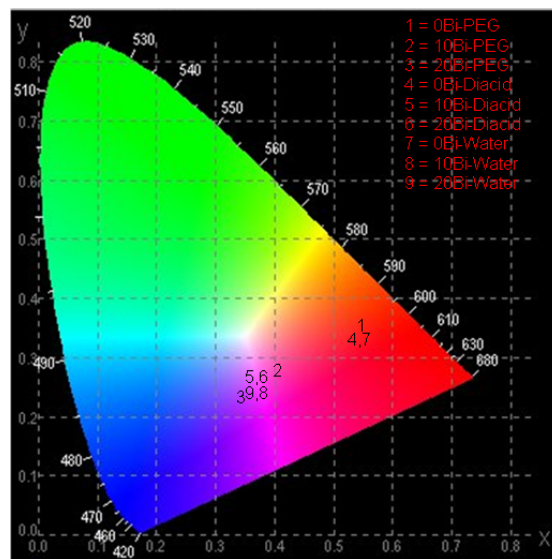

Fig. S10. CIE-coordinates obtained from  $\text{YPO}_4:\text{Eu}$  co-doped with different concentrations of  $\text{Bi}^{3+}$  (0, 10 and 20 at. %) samples prepared in PEG, PEG-diacid and water mediums.

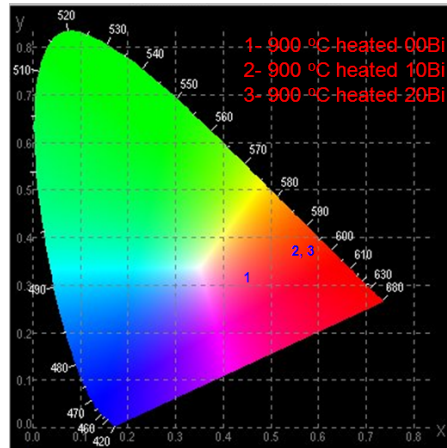

Fig. S11. CIE-coordinates obtained from 900 °C heated  $\text{YPO}_4:\text{Eu}$  co-doped with different concentrations of  $\text{Bi}^{3+}$  (0, 10 and 20 at. %) samples prepared in PEG-diacid.
